# Supplementary material for: Combination therapy using microwave ablation and d-mannose-chelated iron oxide nanoparticles inhibits hepatocellular carcinoma progression
Source: PubMed Central journal article supplement — Acta Pharm Sin B. 2022 May 29;12(9):3475–85. doi: 10.1016/j.apsb.2022.05.026 (PMC9513490; doi:10.1016/j.apsb.2022.05.026), 2022-05-29
Supplement: mmc1.pdf [file mmc1.pdf]

## Supporting Information for

### Original article

# Combination therapy using microwave ablation and D-mannose-chelated iron oxide nanoparticles inhibits hepatocellular carcinoma progression

Rui Cui<sup>a,b,†</sup>, Luo Wang<sup>a,†</sup>, Dongyun Zhang<sup>a,†</sup>, Kun Zhang<sup>c,d</sup>, Jianping Dou<sup>a</sup>, Linan Dong<sup>a</sup>, Yixuan Zhang<sup>a</sup>, Jiapeng Wu<sup>a</sup>, Longfei Tan<sup>e,\*</sup>, Jie Yu<sup>a,\*</sup>, Ping Liang<sup>a,\*</sup>

<sup>a</sup>*Department of Interventional Ultrasound, PLA General Hospital, Beijing 100853, China*

<sup>b</sup>*Department of Medical Ultrasonics, the Sixth Affiliated Hospital of Sun Yat-sen University, Guangzhou 510655, China.*

<sup>c</sup>*Laboratory of Controllable Preparation and App Department of Medical Ultrasound, Shanghai Tenth People's Hospital, Tongji University School of Medicine, Shanghai 200072, China*

<sup>d</sup>*Ultrasound Research and Education Institute, Tongji University School of Medicine, Shanghai 200072, China*

<sup>e</sup>*Laboratory of Controllable Preparation and Application of Nanomaterials, Key Laboratory of Cryogenics, Technical Institute of Physics and Chemistry, Chinese Academy of Sciences, Beijing 100190, China*

Received 24 December 2021; received in revised form 17 April 2022; accepted 11 May 2022

\*Corresponding authors. Tel./fax: +86 10 66939530 (Jie Yu and Ping Liang), +86 10 82543521 (Longfei Tan).

E-mail addresses: longfeit@ipc.ac.cn (Longfei Tan), jiemi301@163.com (Jie Yu), liangping301@hotmail.com (Ping Liang).

<sup>†</sup>These authors made equal contributions to this work.

Running title: Microwave ablation and D-mannose-chelated iron oxide nanoparticles inhibit HCC progression

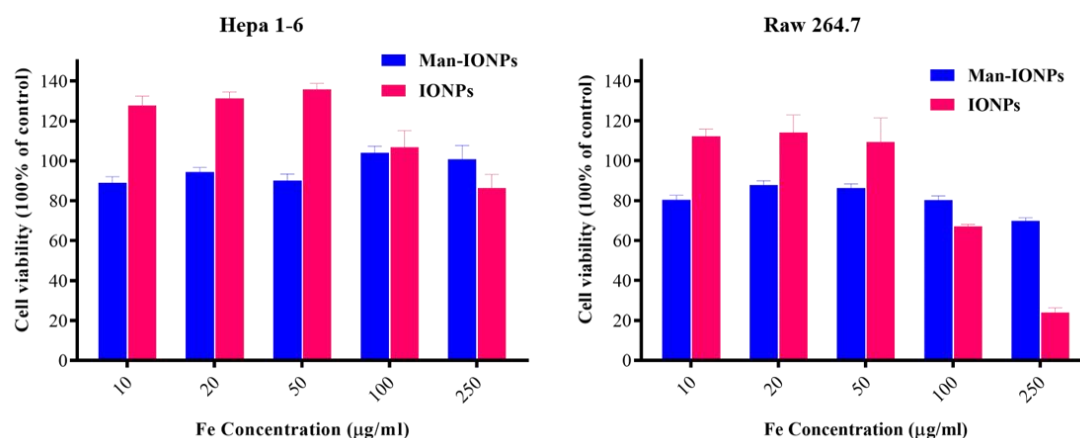

**Figure S1** Viability of RAW264.7 (left) and Hepa1-6 (right) cells after incubation with man-IONPs or IONPs. Data are expressed as mean  $\pm$  SD ( $n = 3$ ).

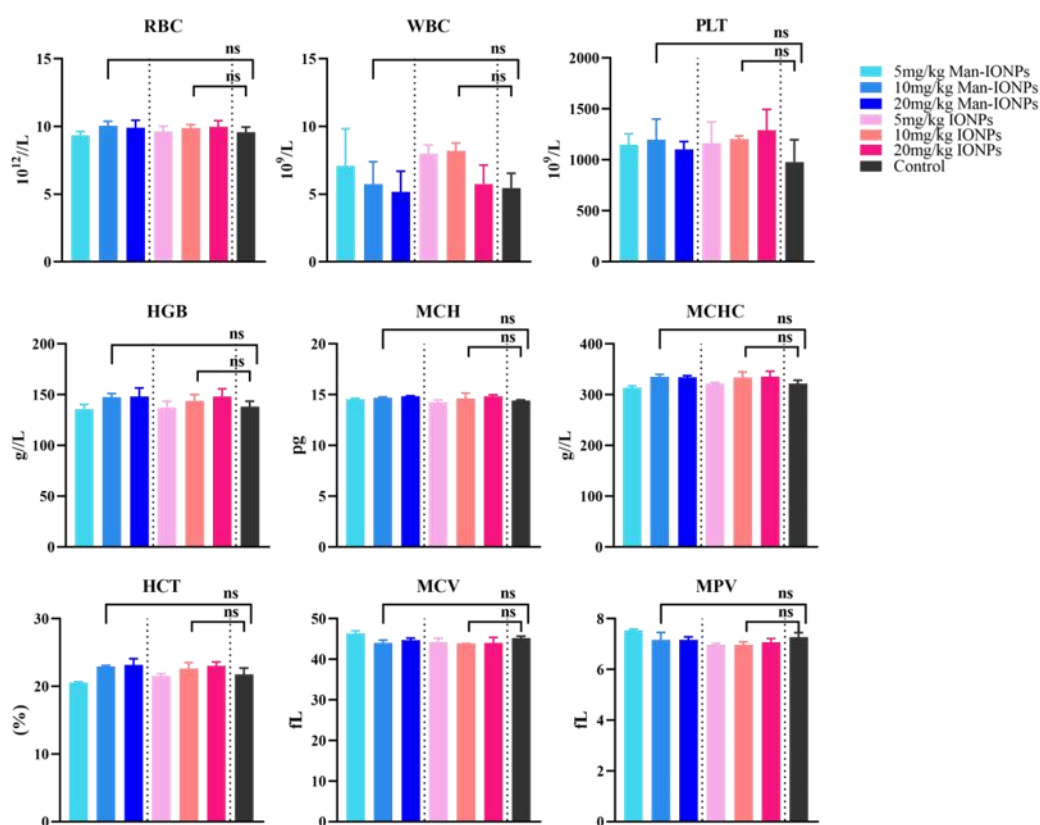

**Figure S2** Routine blood tests of mice at 2 weeks after injecting man-IONPs or IONPs. Data are expressed as mean  $\pm$  SD ( $n = 3$ ).

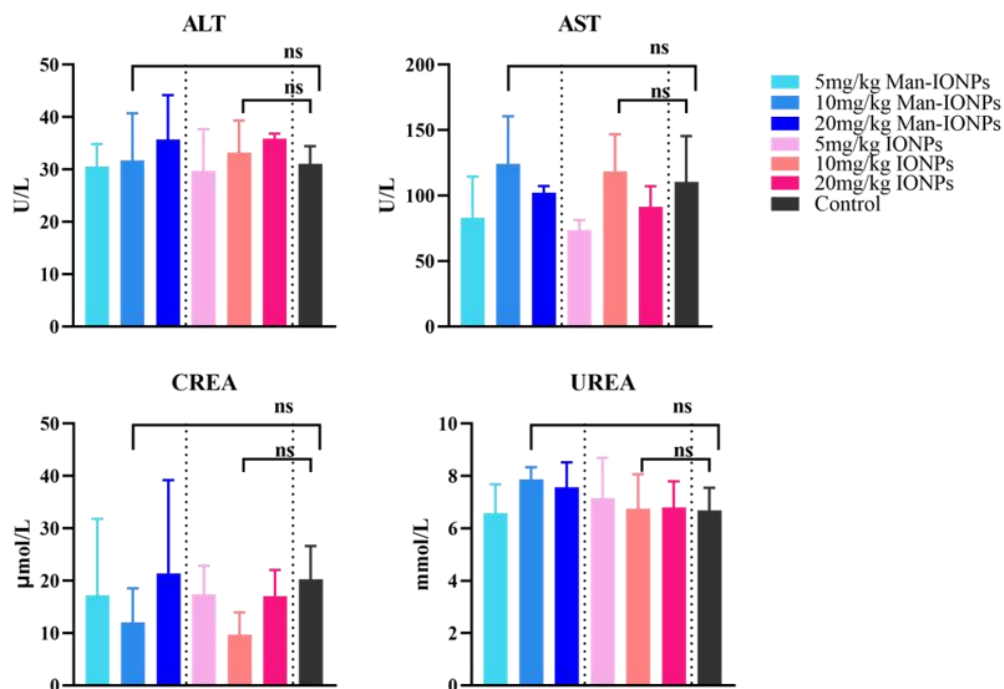

**Figure S3.** Biochemical tests of mice at 2 weeks after injecting man-IONPs or IONPs. Data are expressed as mean  $\pm$  SD ( $n = 3$ ).

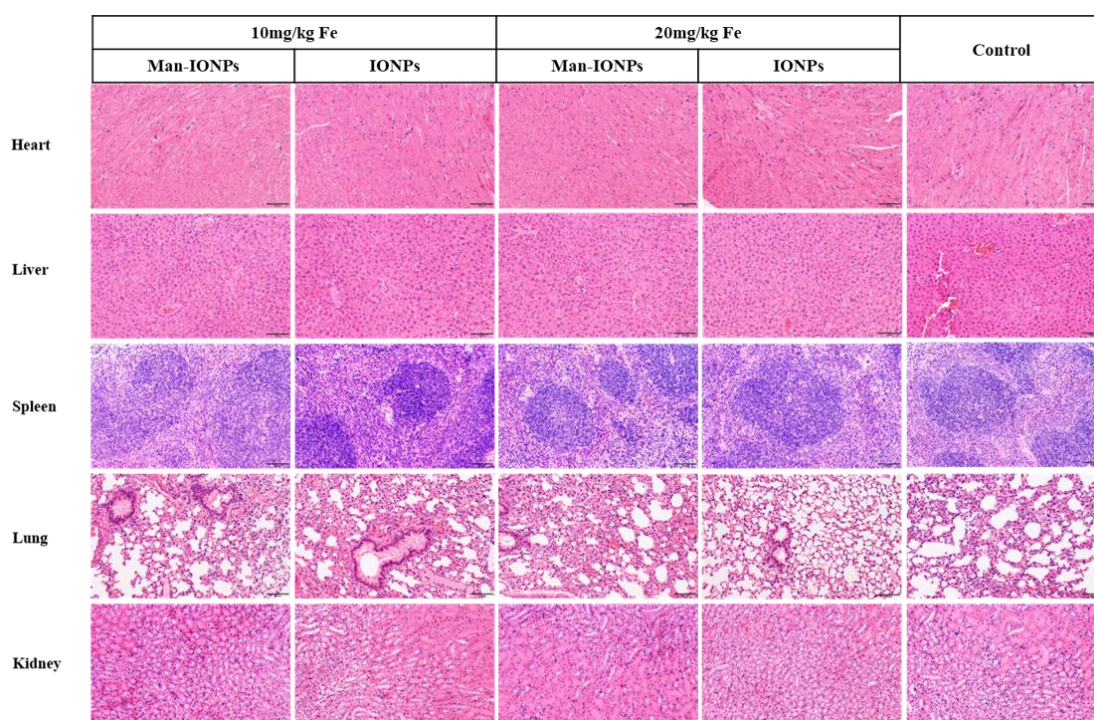

**Figure S4.** Hematoxylin-eosin staining of histological sections of mouse organs after injection of man-IONPs or IONPs.

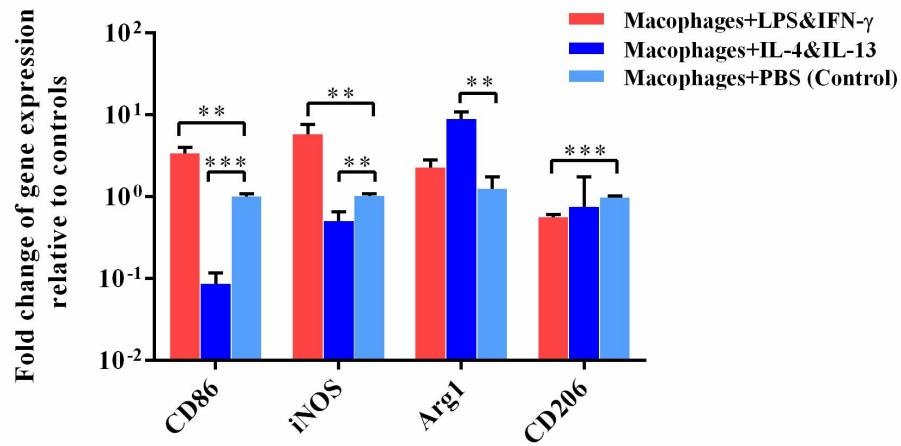

**Figure S5** Percentages of induced M1-like and M2-like macrophage phenotypes from isolated BMDM cells *in vitro*, via PCR. Data are expressed as mean  $\pm$  SD ( $n = 3$ ); \*\*  $P < 0.01$  and \*\*\* $P < 0.001$ .

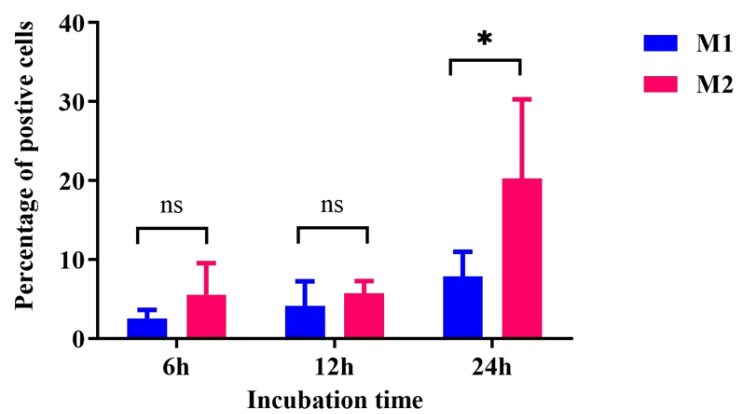

**Figure S6** The relative quantitative value of Man-IONPs in M1- and M2-like macrophages after various incubation periods.

**Table S1** Primers used for qRT-PCR.

| Genens        | Primer sequence (5'-3')                                             |
|---------------|---------------------------------------------------------------------|
| CD86          | Forward TTGTGTGTGTTCTGGAAACGGAG<br>Reverse AACTTAGAGGCTGTGTTGCTGGG  |
| iNOS          | Forward CACCAAGCTGAACTTGAGCG<br>Reverse CGTGGCTTTGGGCTCCTC          |
| TNF- $\alpha$ | Forward GAGTGACAAGCCTGTAGCC<br>Reverse CTCCTGGTATGAGATAGCAAA        |
| CD206         | Fwd GGATTGTGGAGCAGATGGAAG<br>Rev CTTGAATGGAAATGCACAGAC              |
| Ym1           | Forward CAAGTTGAAGGCTCAGTGGCTC<br>Reverse CAAATCATTGTGTAAAGCTCCTCTC |
| Fizz          | Forward CTGCCCTGCTGGGATGACT<br>Reverse CATCATATCAAAGCTGGGTTCTCC     |
| IL-10         | Forward CAAGGAGCATTGAATTCCC<br>Reverse GGCCTTGTAGACACCTTGGTC        |
| IL-1 $\beta$  | Forward TGGGAAACAACAGTGGTCAGG<br>Reverse CCATCAGAGGCAAGGAGGAA       |
| IRF4          | Forward CTTTGAGGAATTGGTCGAGAGG<br>Reverse GAGAGCCATAAGGTGCTGTCA     |
